# Supplementary material for: Identification of an RNA-Binding-Protein-Based Prognostic Model for Ewing Sarcoma
Source: MDPI journal article supplement (doi:10.3390/cancers13153736), 2021-07-25
Supplement: s1 [file s1]

| <b>RBP gene symbol</b> | <b>Gene description</b>                                     | <b>No. of edges (degree)</b> |
|------------------------|-------------------------------------------------------------|------------------------------|
| EIF4A3                 | Eukaryotic initiation factor 4A-III                         | 54                           |
| POLR2F                 | DNA-directed RNA polymerases I, II, and III subunit RPABC2  | 49                           |
| SRSF1                  | Serine/arginine-rich splicing factor 1                      | 48                           |
| POLR2E                 | DNA-directed RNA polymerases I, II, and III subunit RPABC1  | 47                           |
| POLR2L                 | DNA-directed RNA polymerases I, II, and III subunit RPABC5  | 47                           |
| SNRPB                  | Small nuclear ribonucleoprotein-associated proteins B and B | 47                           |
| POLR2I                 | DNA-directed RNA polymerase II subunit RPB9                 | 46                           |
| PCF11                  | Pre-mRNA cleavage complex 2 protein Pcf11                   | 45                           |
| POLR2G                 | DNA-directed RNA polymerase II subunit RPB7                 | 45                           |
| SNRPF                  | Small nuclear ribonucleoprotein F                           | 45                           |
| PRPF19                 | Pre-mRNA-processing factor 19                               | 44                           |
| SF3B1                  | Splicing factor 3B subunit 1                                | 44                           |
| RNPS1                  | RNA-binding protein with serine-rich domain 1               | 41                           |
| CSTF3                  | Cleavage stimulation factor subunit 3                       | 40                           |
| SRSF11                 | Serine/arginine-rich splicing factor 11                     | 40                           |
