# Supplementary material for: Identification of an RNA-Binding-Protein-Based Prognostic Model for Ewing Sarcoma
Source: MDPI journal article supplement (doi:10.3390/cancers13153736), 2021-07-25
Supplement: s1 [file s1]

| Reactome pathways                               | No. of genes | Term <i>P</i> .Value |
|-------------------------------------------------|--------------|----------------------|
| Metabolism of RNA                               | 74           | 7.20E-54             |
| Processing of Capped Intron-Containing Pre-mRNA | 40           | 2.53E-34             |
| mRNA Splicing                                   | 36           | 4.40E-33             |
| mRNA Splicing - Major Pathway                   | 33           | 1.27E-29             |
| Translation                                     | 31           | 1.08E-20             |
| mRNA Splicing - Minor Pathway                   | 16           | 9.56E-19             |
| Mitochondrial translation                       | 18           | 5.41E-17             |
| Mitochondrial translation termination           | 16           | 7.59E-15             |
| Mitochondrial translation elongation            | 16           | 7.59E-15             |
| Mitochondrial translation initiation            | 16           | 7.59E-15             |
| RNA Polymerase II Transcription Termination     | 13           | 1.38E-12             |
| Deadenylation-dependent mRNA decay              | 12           | 2.36E-12             |
| RNA polymerase II transcribes snRNA genes       | 12           | 9.65E-11             |
| mRNA 3'-end processing                          | 11           | 1.02E-10             |
| rRNA modification in the nucleus and cytosol    | 10           | 4.67E-09             |
