# Supplementary material for: Identification of an RNA-Binding-Protein-Based Prognostic Model for Ewing Sarcoma
Source: MDPI journal article supplement (doi:10.3390/cancers13153736), 2021-07-25
Supplement: s1 [file s1]

| GO term (biological process)                      | No. of genes | Term <i>P</i> .Value |
|---------------------------------------------------|--------------|----------------------|
| RNA processing                                    | 126          | 3.37E-103            |
| mRNA processing                                   | 79           | 6.02E-65             |
| mRNA metabolic process                            | 92           | 3.74E-63             |
| RNA splicing                                      | 69           | 1.48E-56             |
| ncRNA metabolic process                           | 57           | 7.09E-40             |
| translation                                       | 61           | 2.15E-36             |
| ncRNA processing                                  | 46           | 7.80E-32             |
| ribonucleoprotein complex assembly                | 35           | 1.41E-30             |
| posttranscriptional regulation of gene expression | 55           | 4.74E-30             |
| regulation of translation                         | 38           | 2.06E-22             |
| RNA 3'-end processing                             | 24           | 1.42E-19             |
| RNA catabolic process                             | 35           | 1.88E-19             |
| rRNA processing                                   | 26           | 2.29E-18             |
| mitochondrial translation                         | 21           | 1.46E-17             |
| regulation of RNA splicing                        | 22           | 6.55E-17             |
