# Supplementary figures and images for: Identification of an RNA-Binding-Protein-Based Prognostic Model for Ewing Sarcoma
Source: MDPI journal article supplement (doi:10.3390/cancers13153736), 2021-07-25

**A**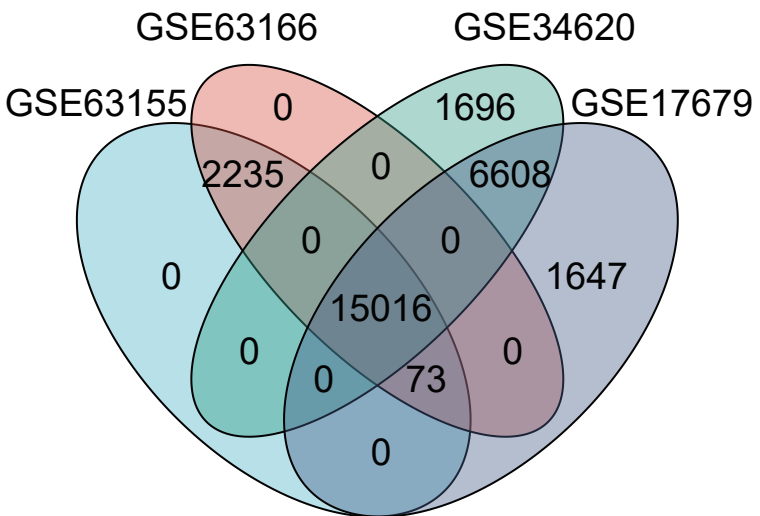**B**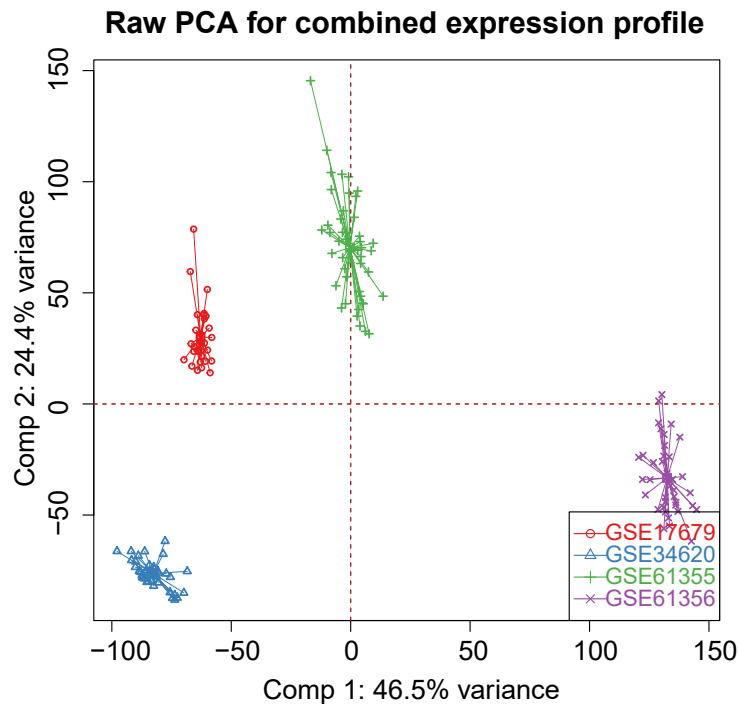**C**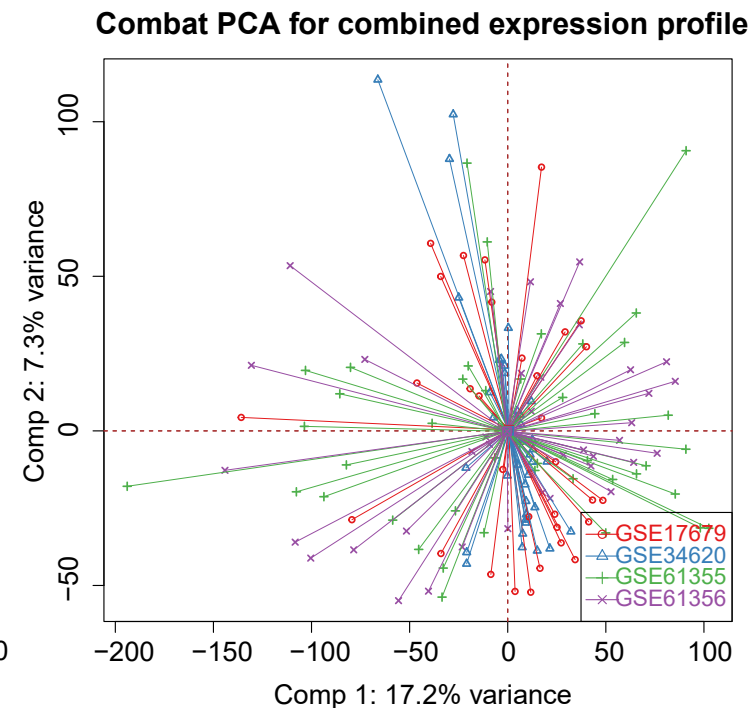**D**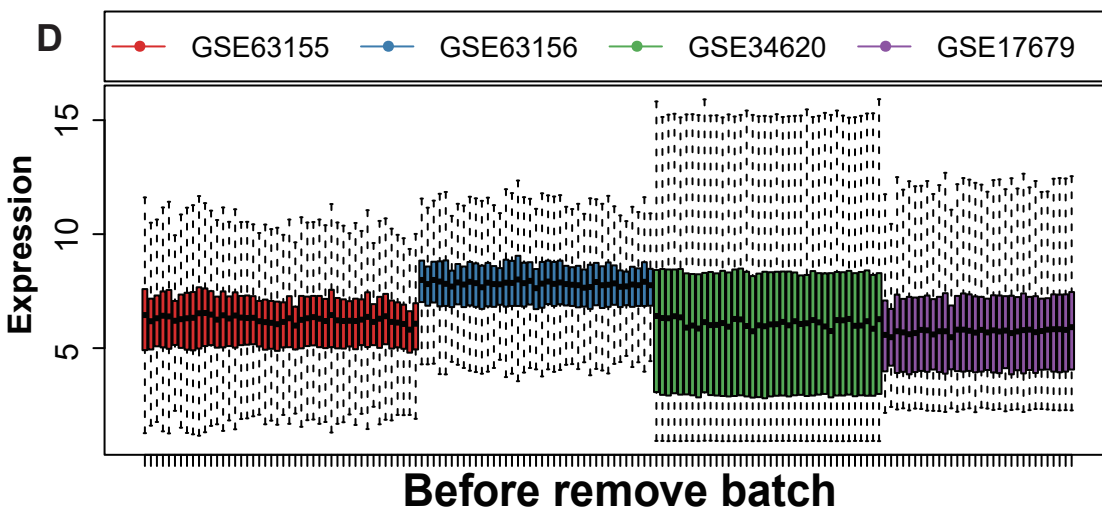**E**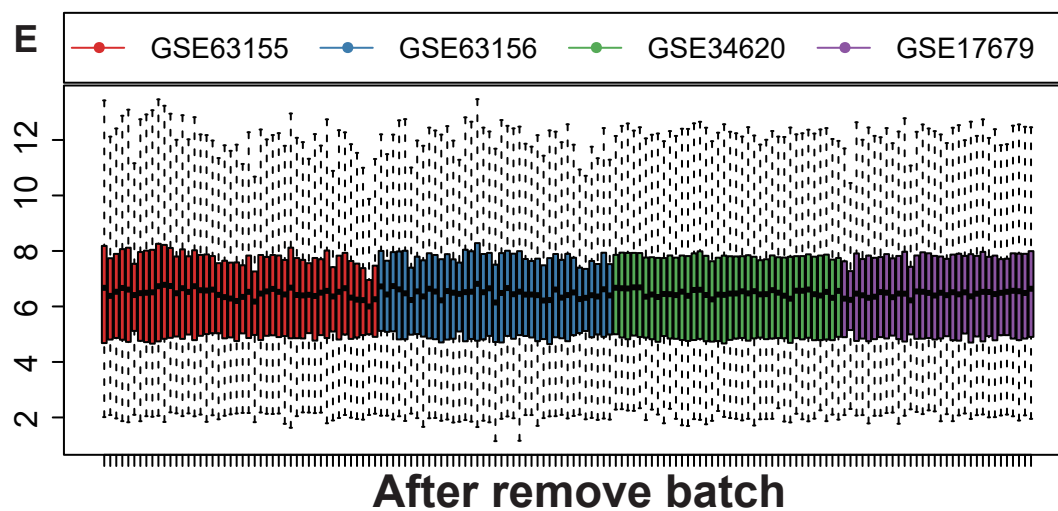

Supplement: s1 [file s1]

**A**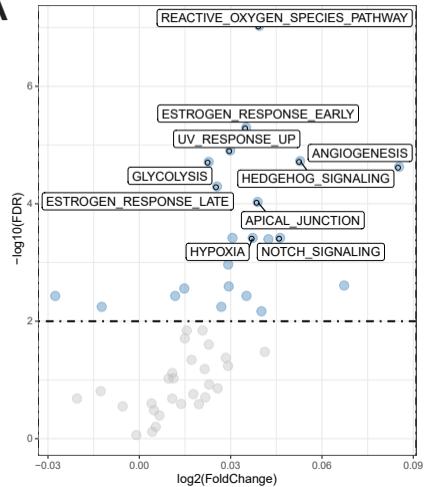**B**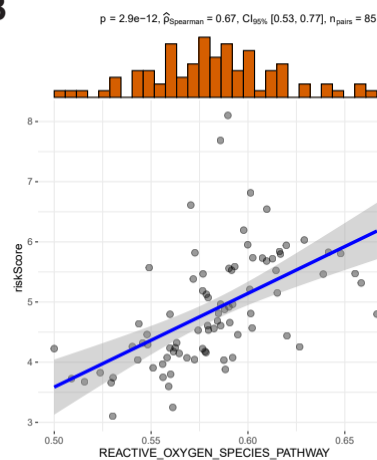**C**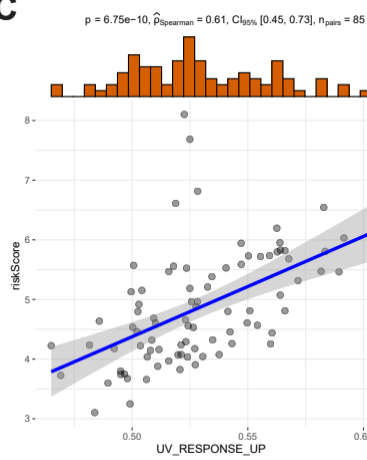**D**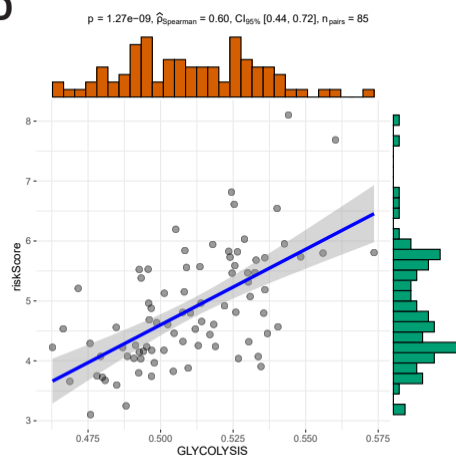

Supplement: s1 [file s1]

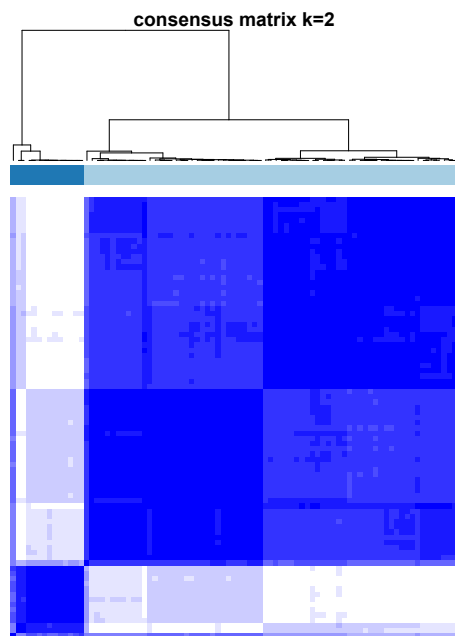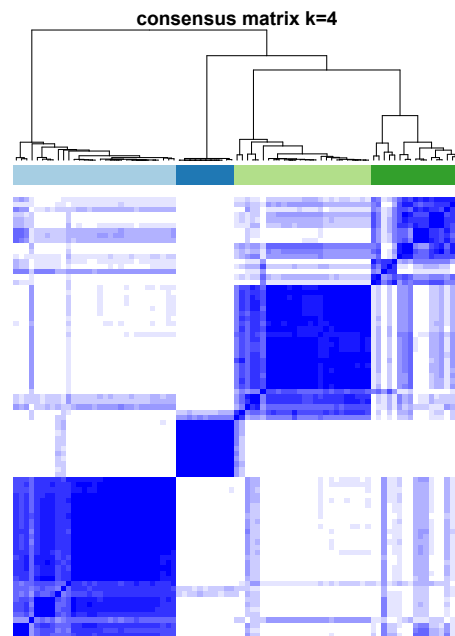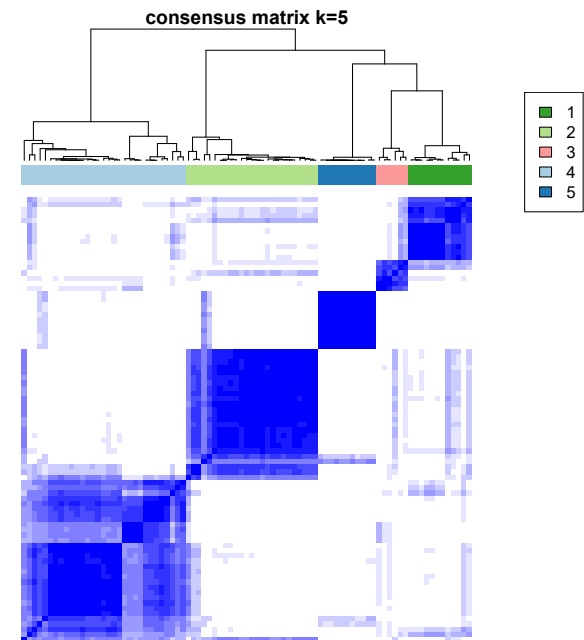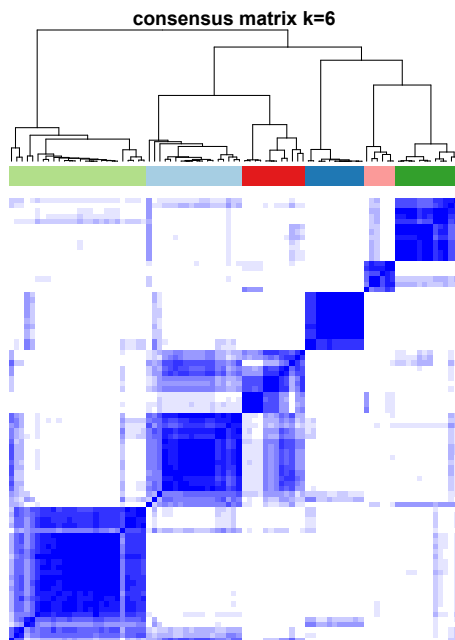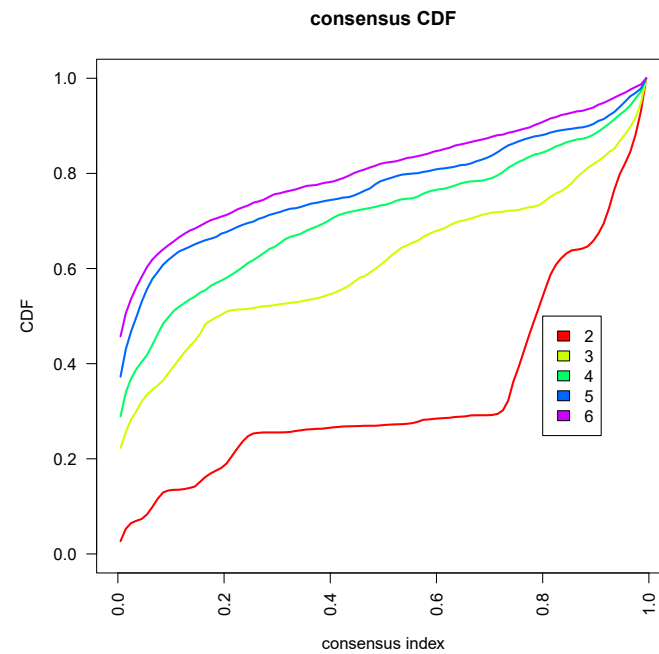

Supplement: s1 [file s1]

A

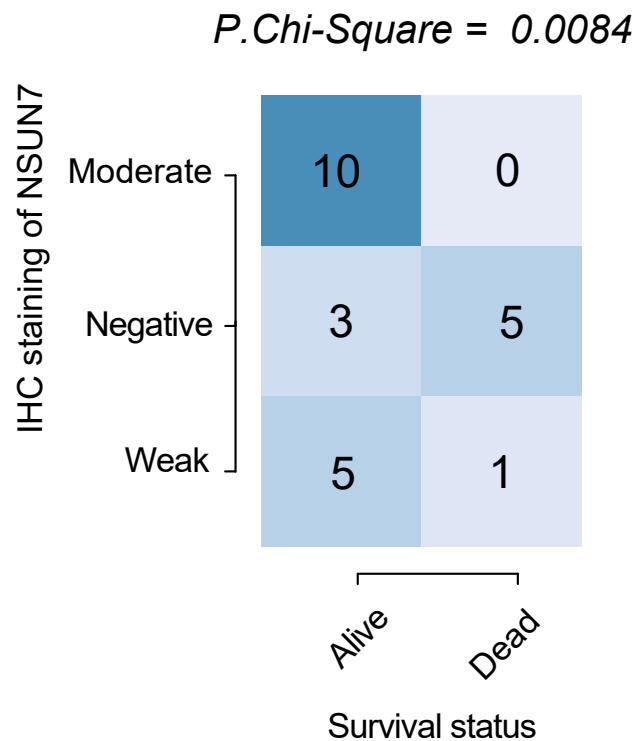

B

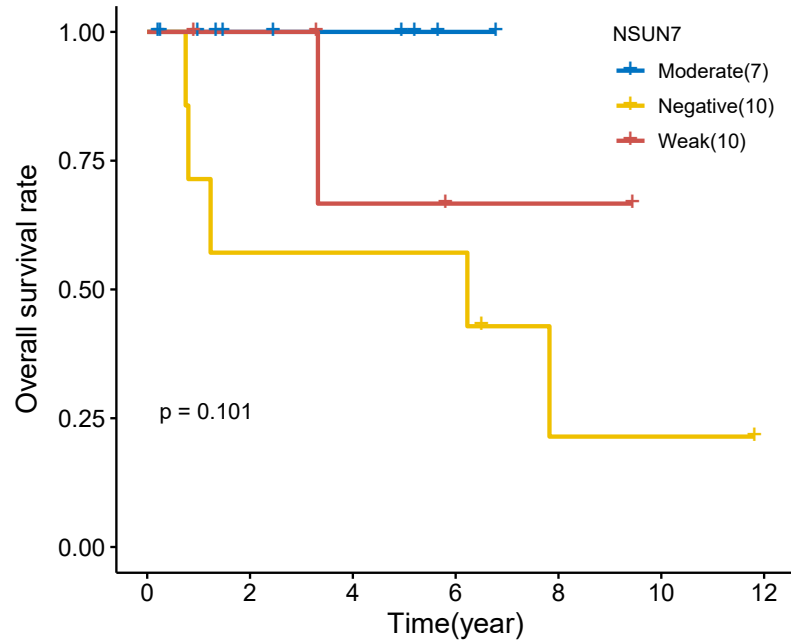

|          |    |   |   |   |   |   |   |
|----------|----|---|---|---|---|---|---|
| Moderate | 10 | 5 | 4 | 1 | 0 | 0 | 0 |
| Negative | 7  | 4 | 4 | 4 | 1 | 1 | 0 |
| Weak     | 5  | 4 | 2 | 1 | 1 | 0 | 0 |

Supplement: s1 [file s1]

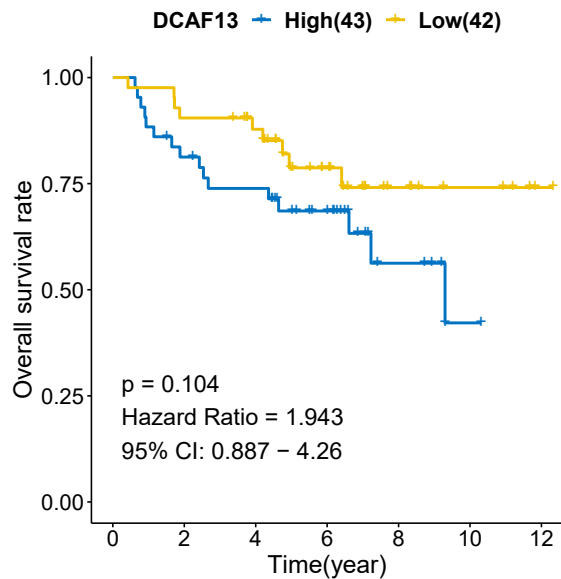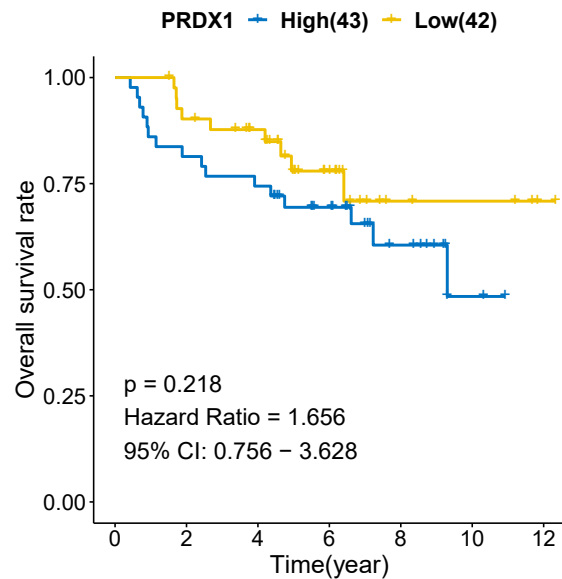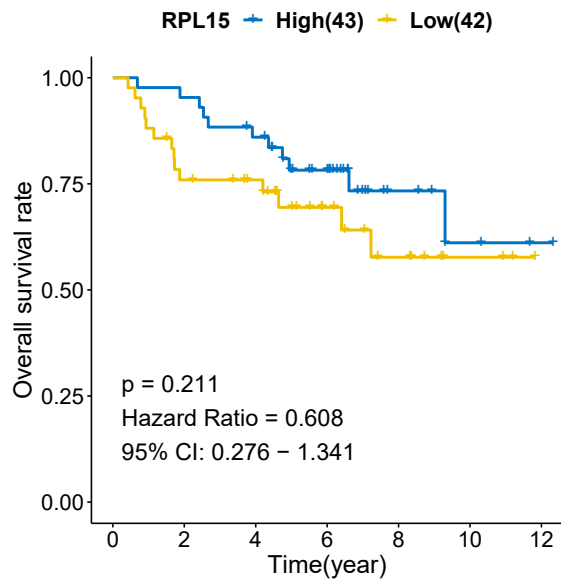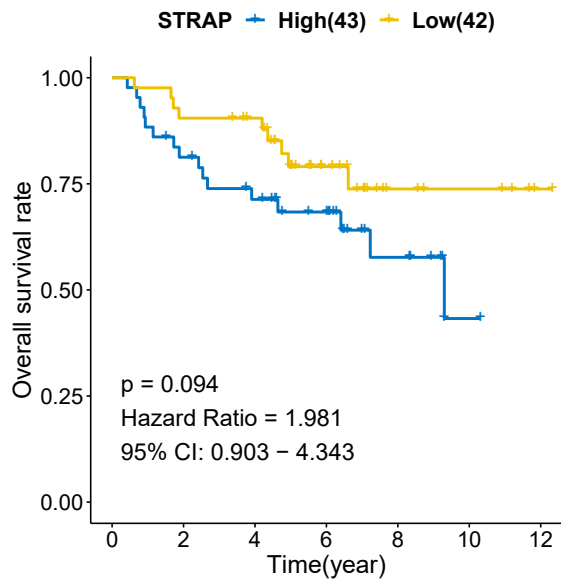

Supplement: s1 [file s1]

A

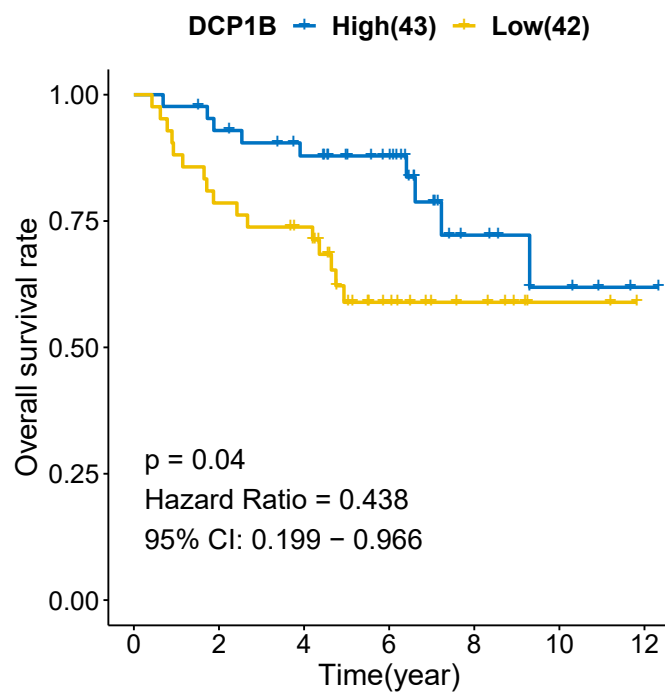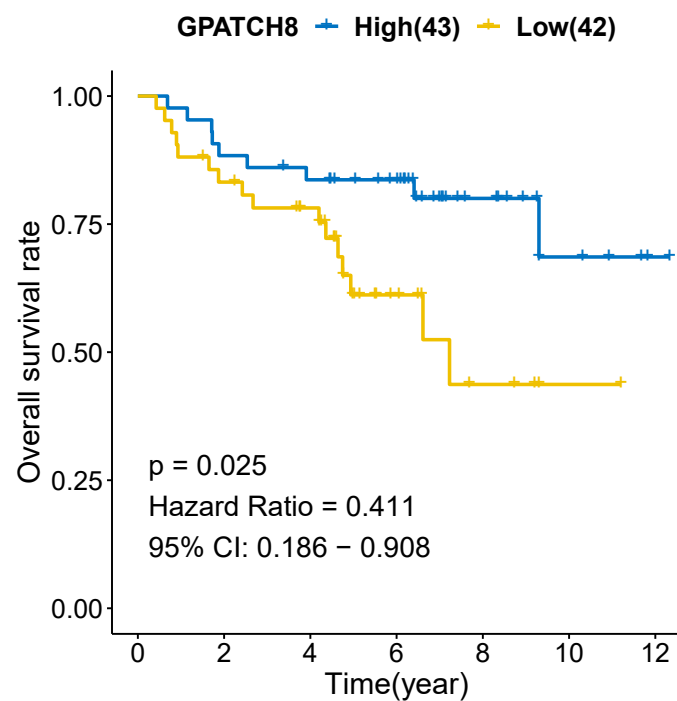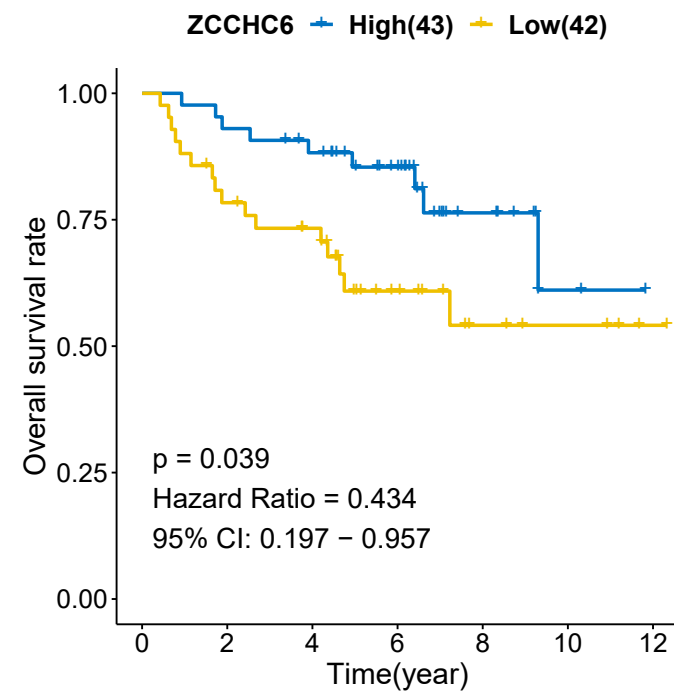

B

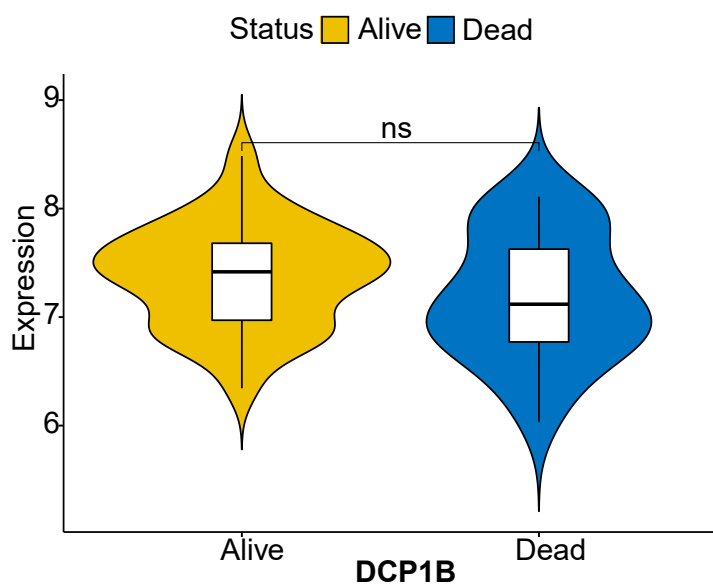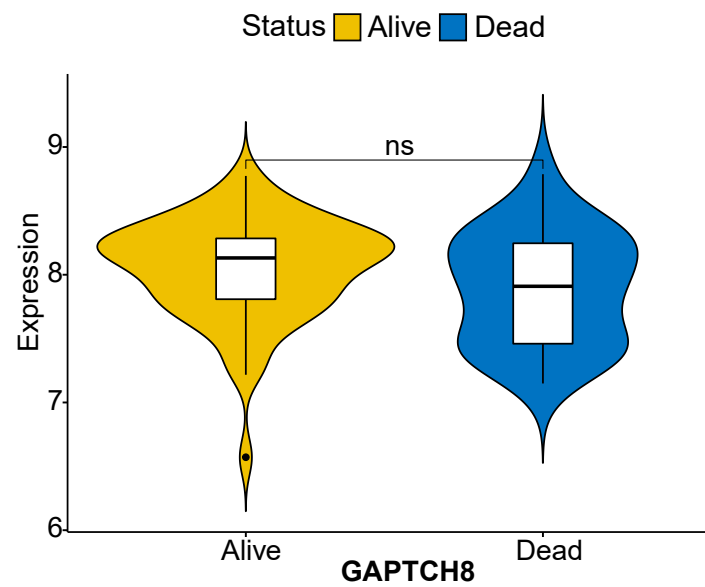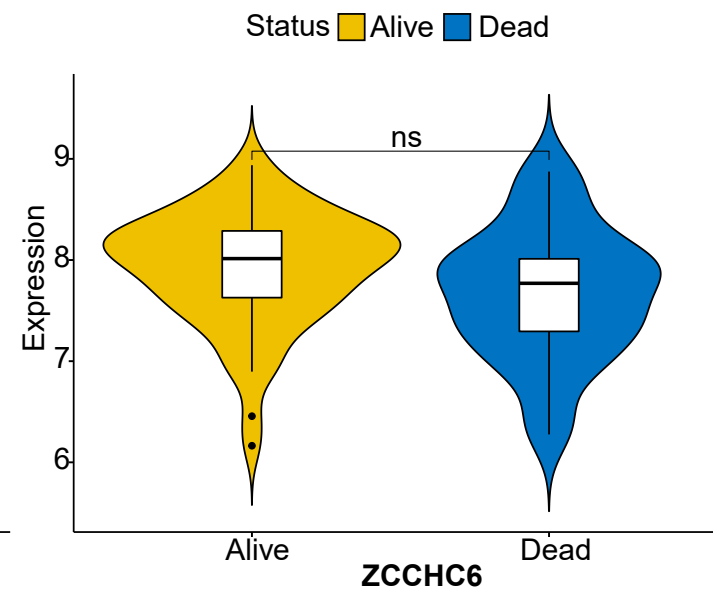

Supplement: s1 [file s1]
